# Supplementary material for: Vascular senescence and leak are features of the early breakdown of the blood–brain barrier in Alzheimer’s disease models
Source: PubMed Central journal article supplement (PMC10643714; doi:10.1007/s11357-023-00927-x), 2023-10-02

Fig. s1

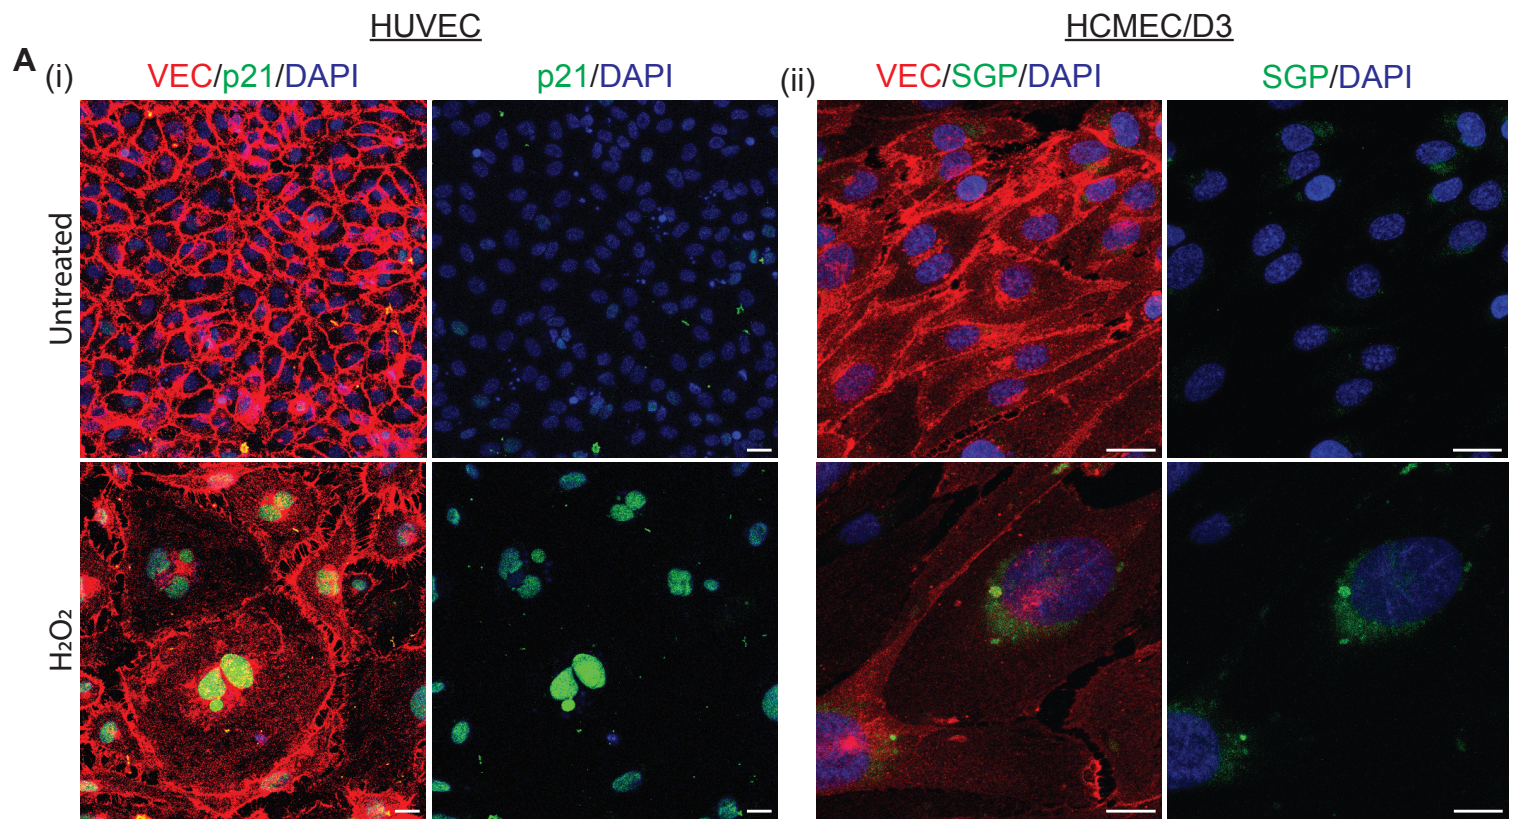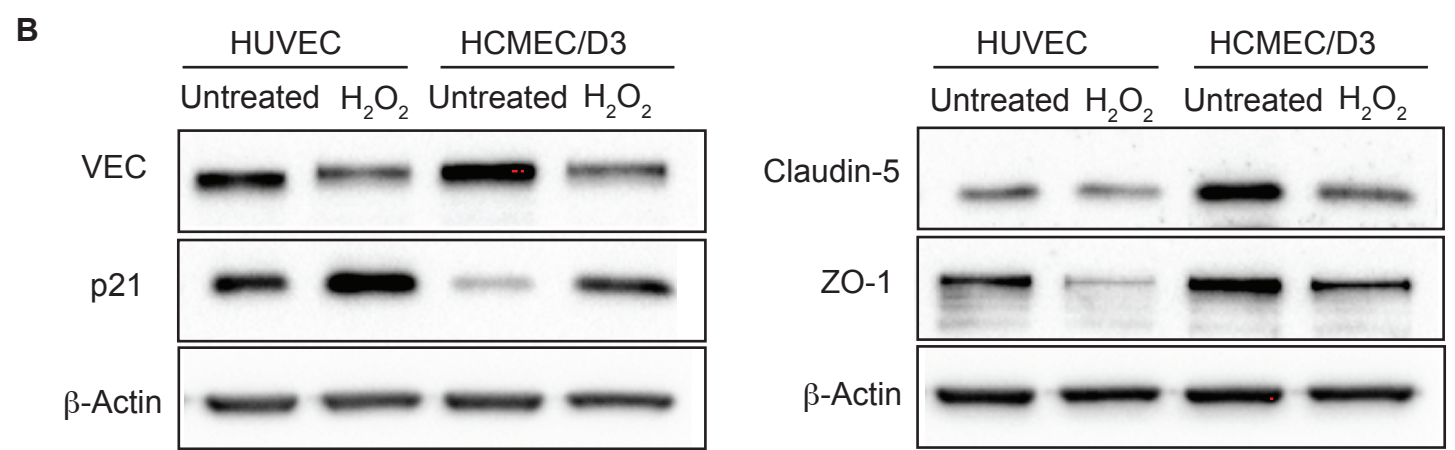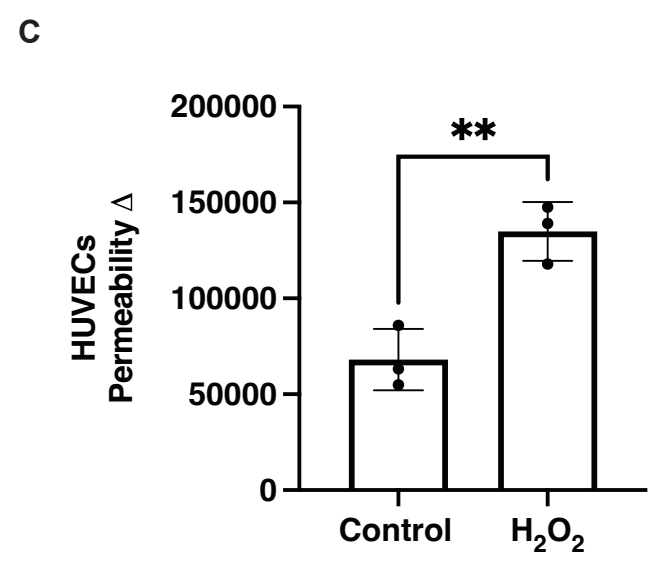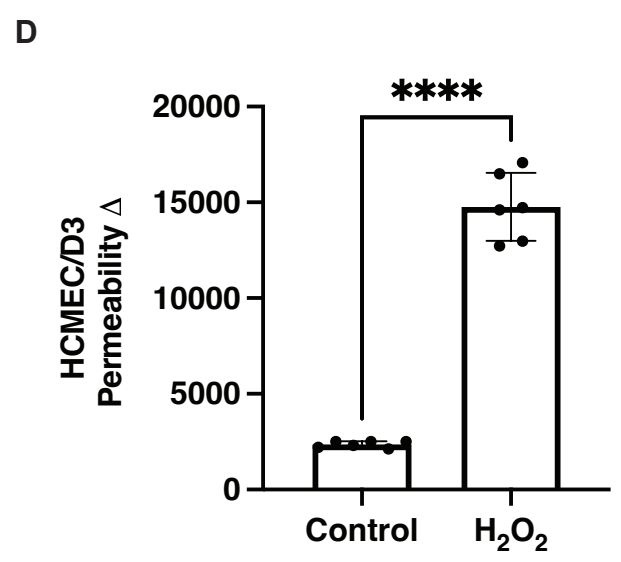

Fig. s2

A

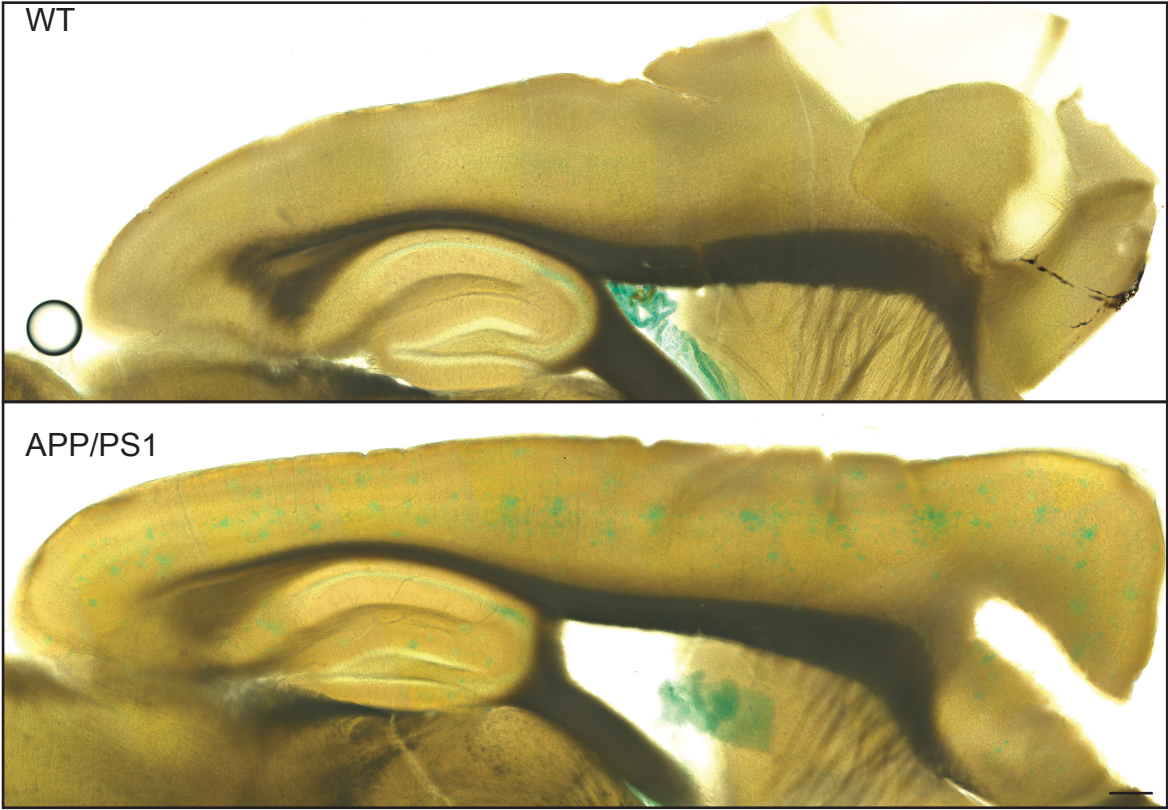

B

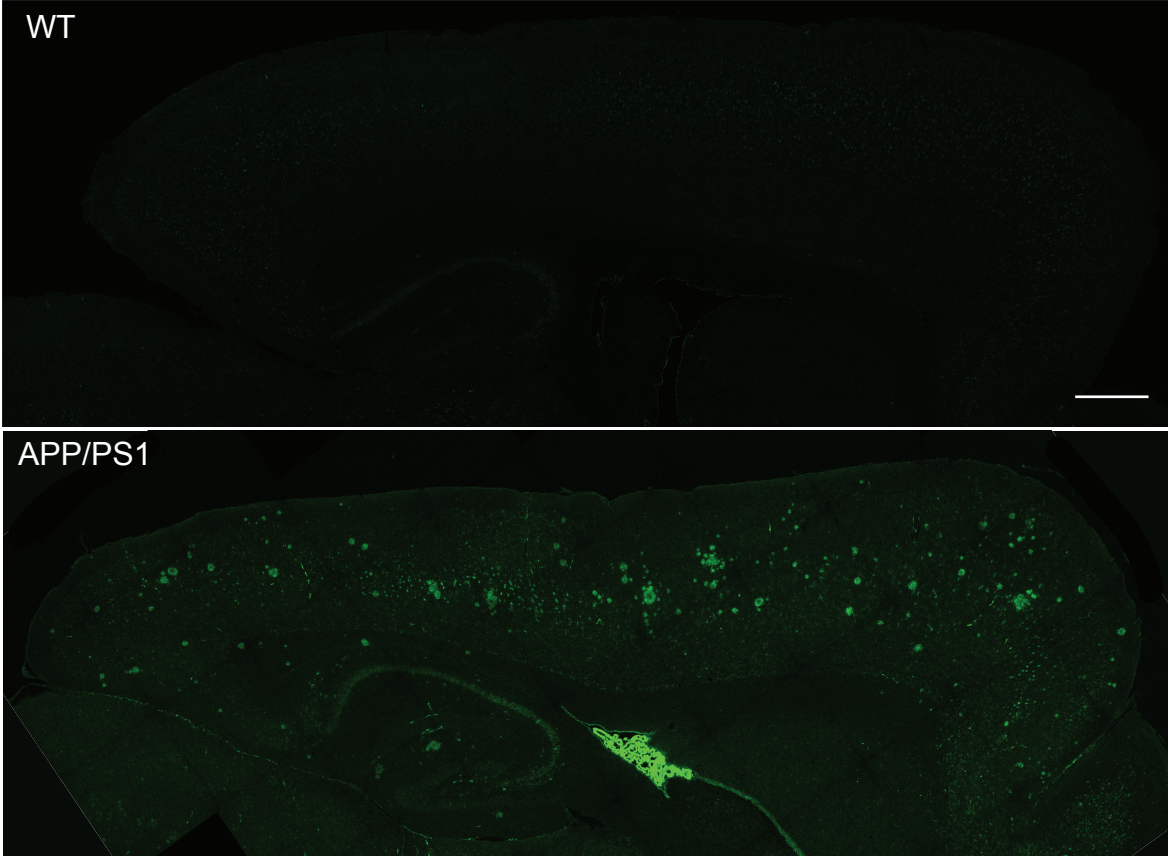

**Fig. s3**

2-months old

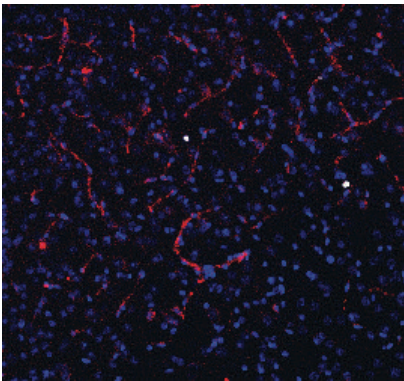

8-months old

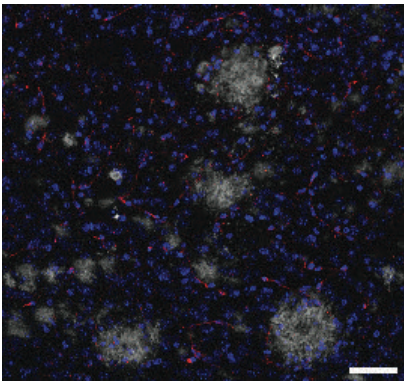

Fig. s4

A

WT (post-plaque)

Albumin

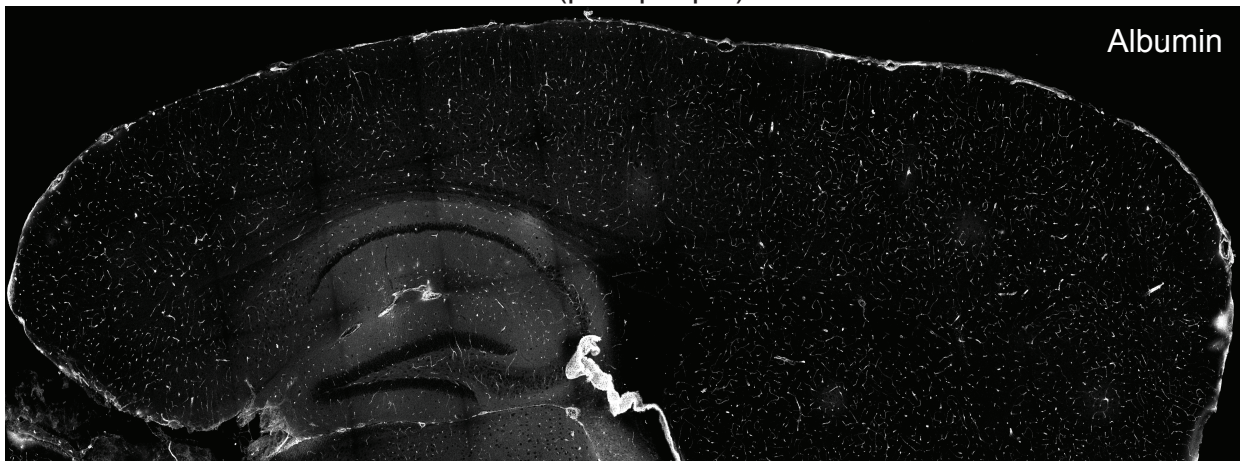

APP/PS1 (post-plaque)

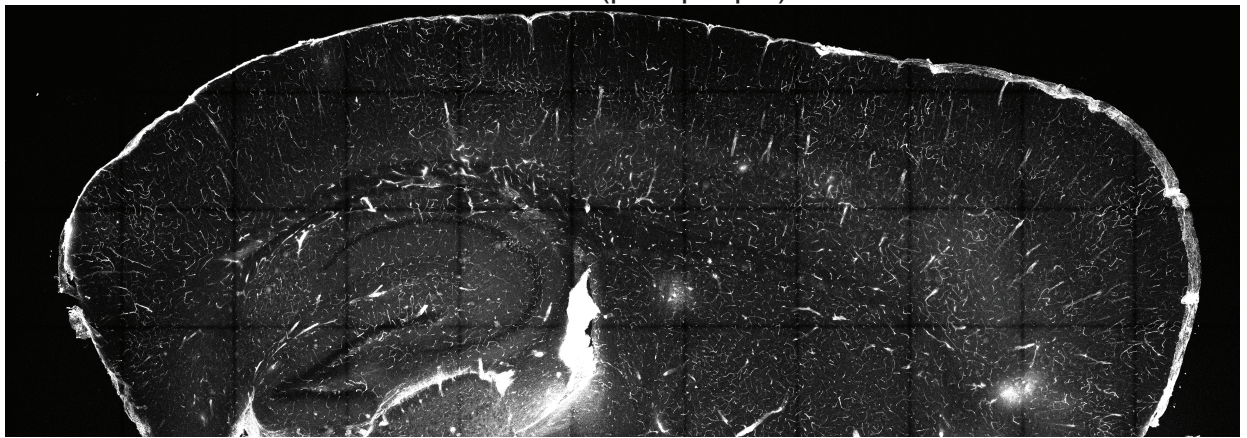

B

WT (pre-plaque)

Biotin

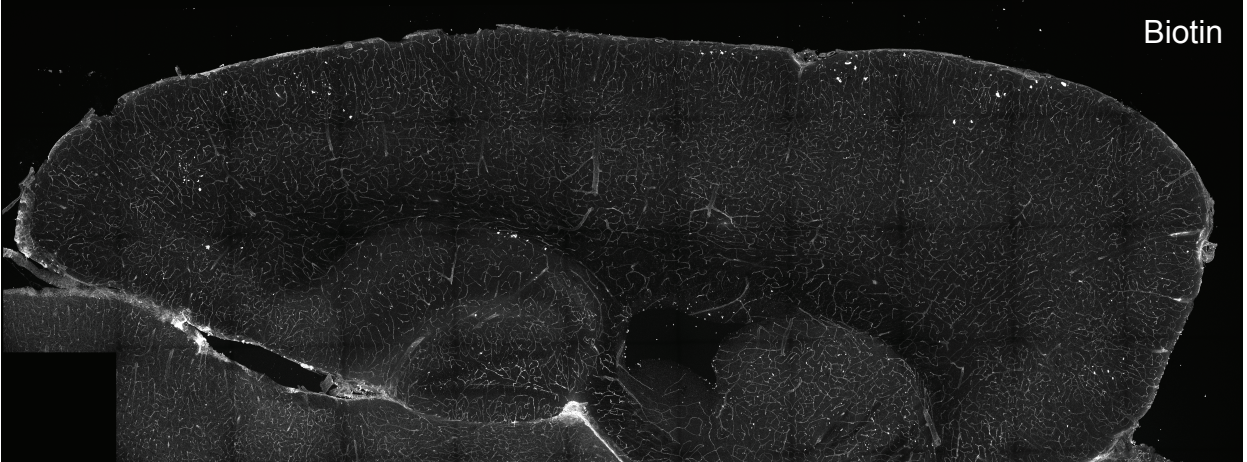

APP/PS1 (pre-plaque)

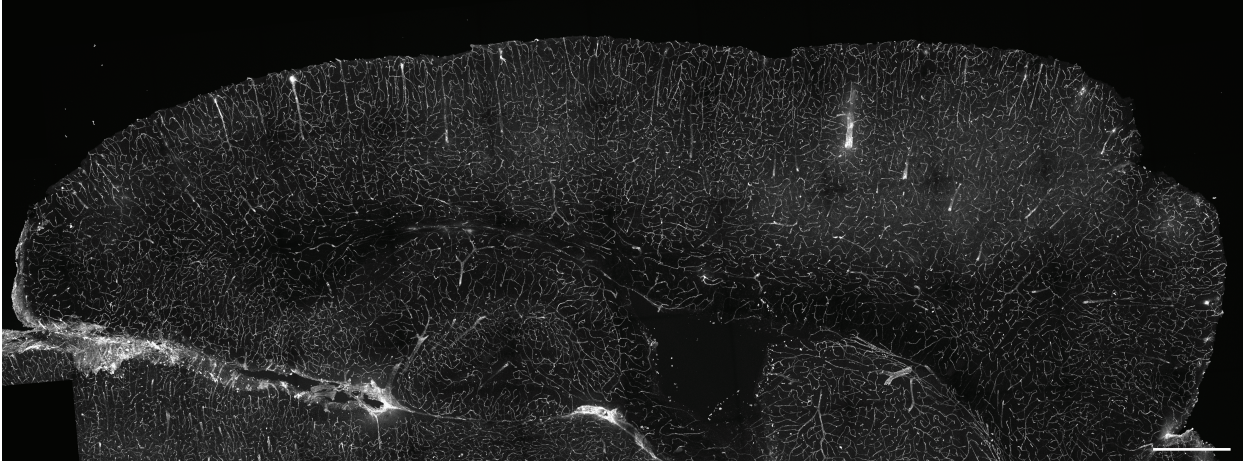

Fig. s5

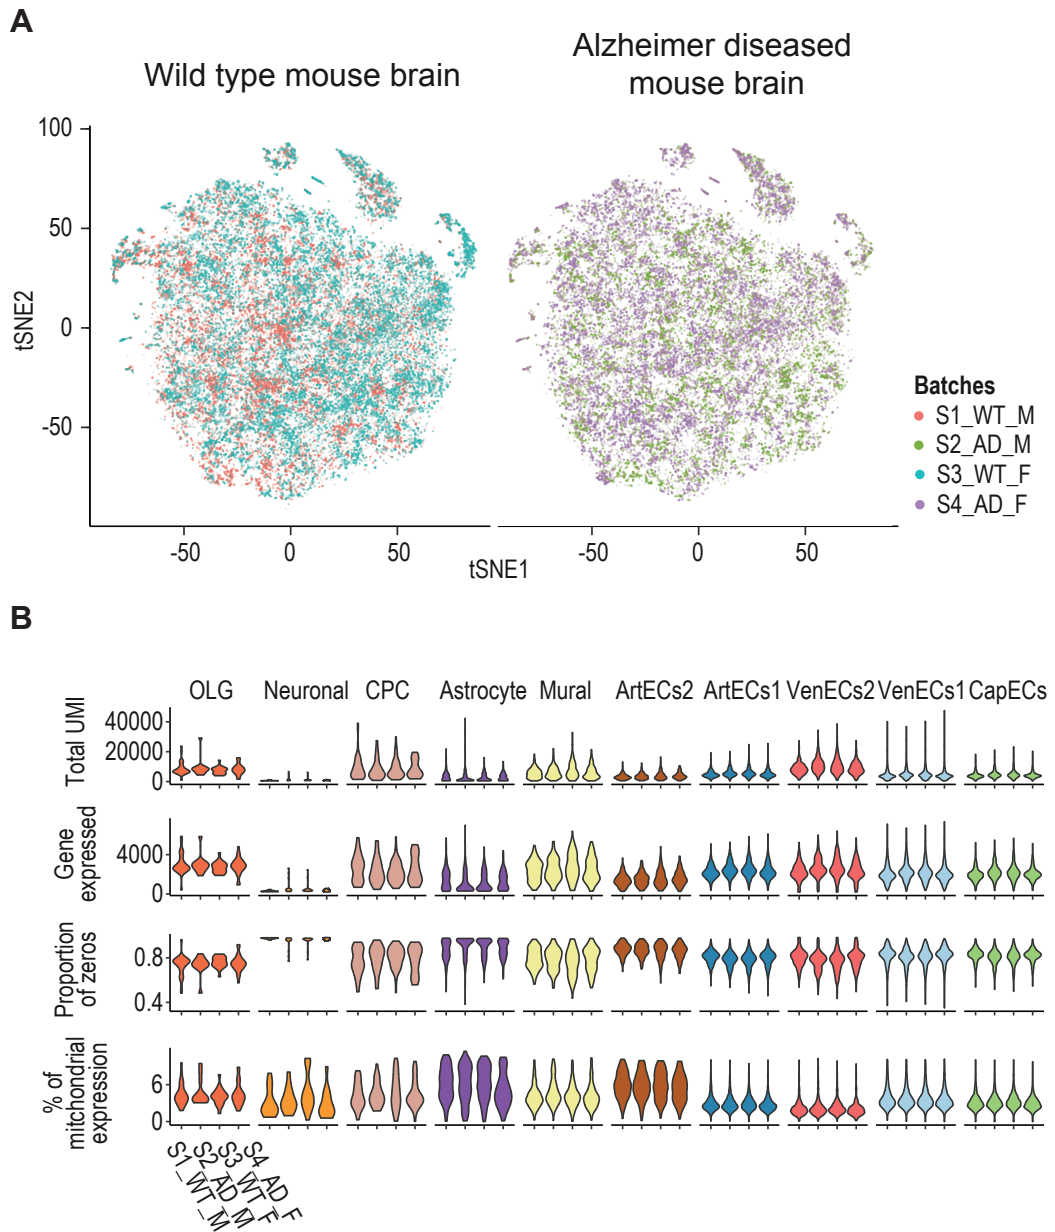

Fig. s6

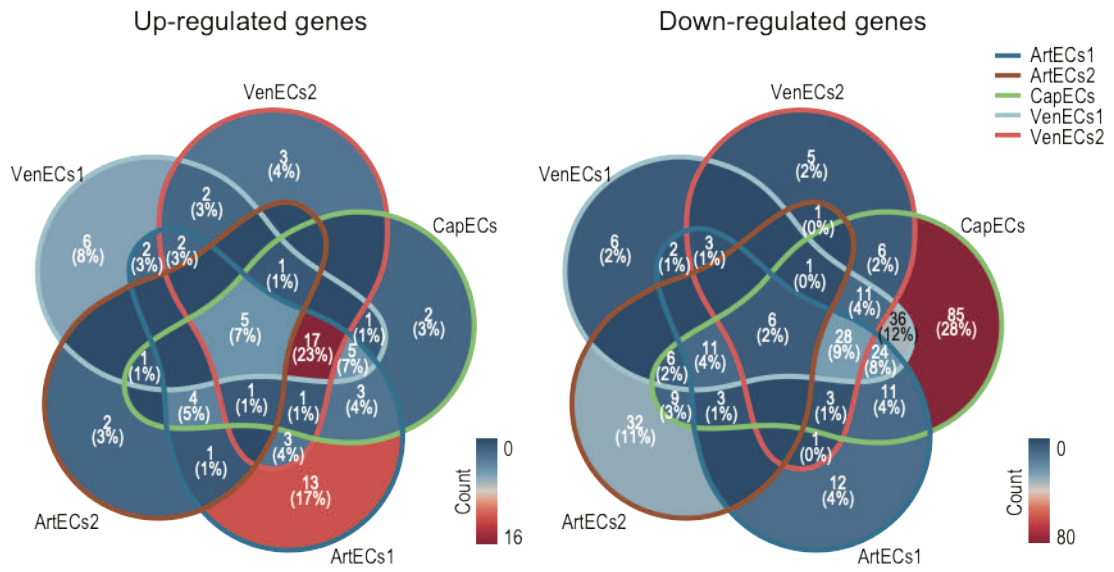

Fig. s7

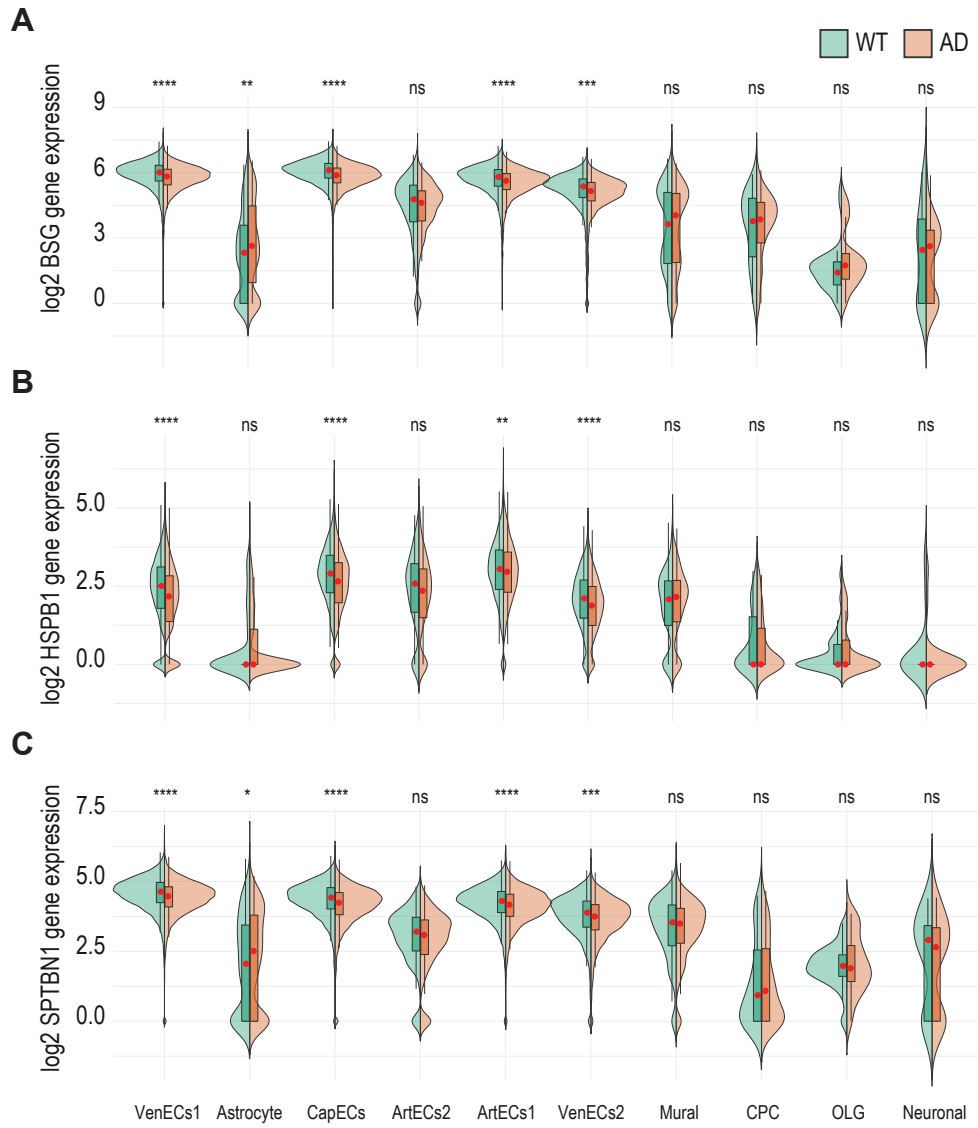

Fig. s8

A

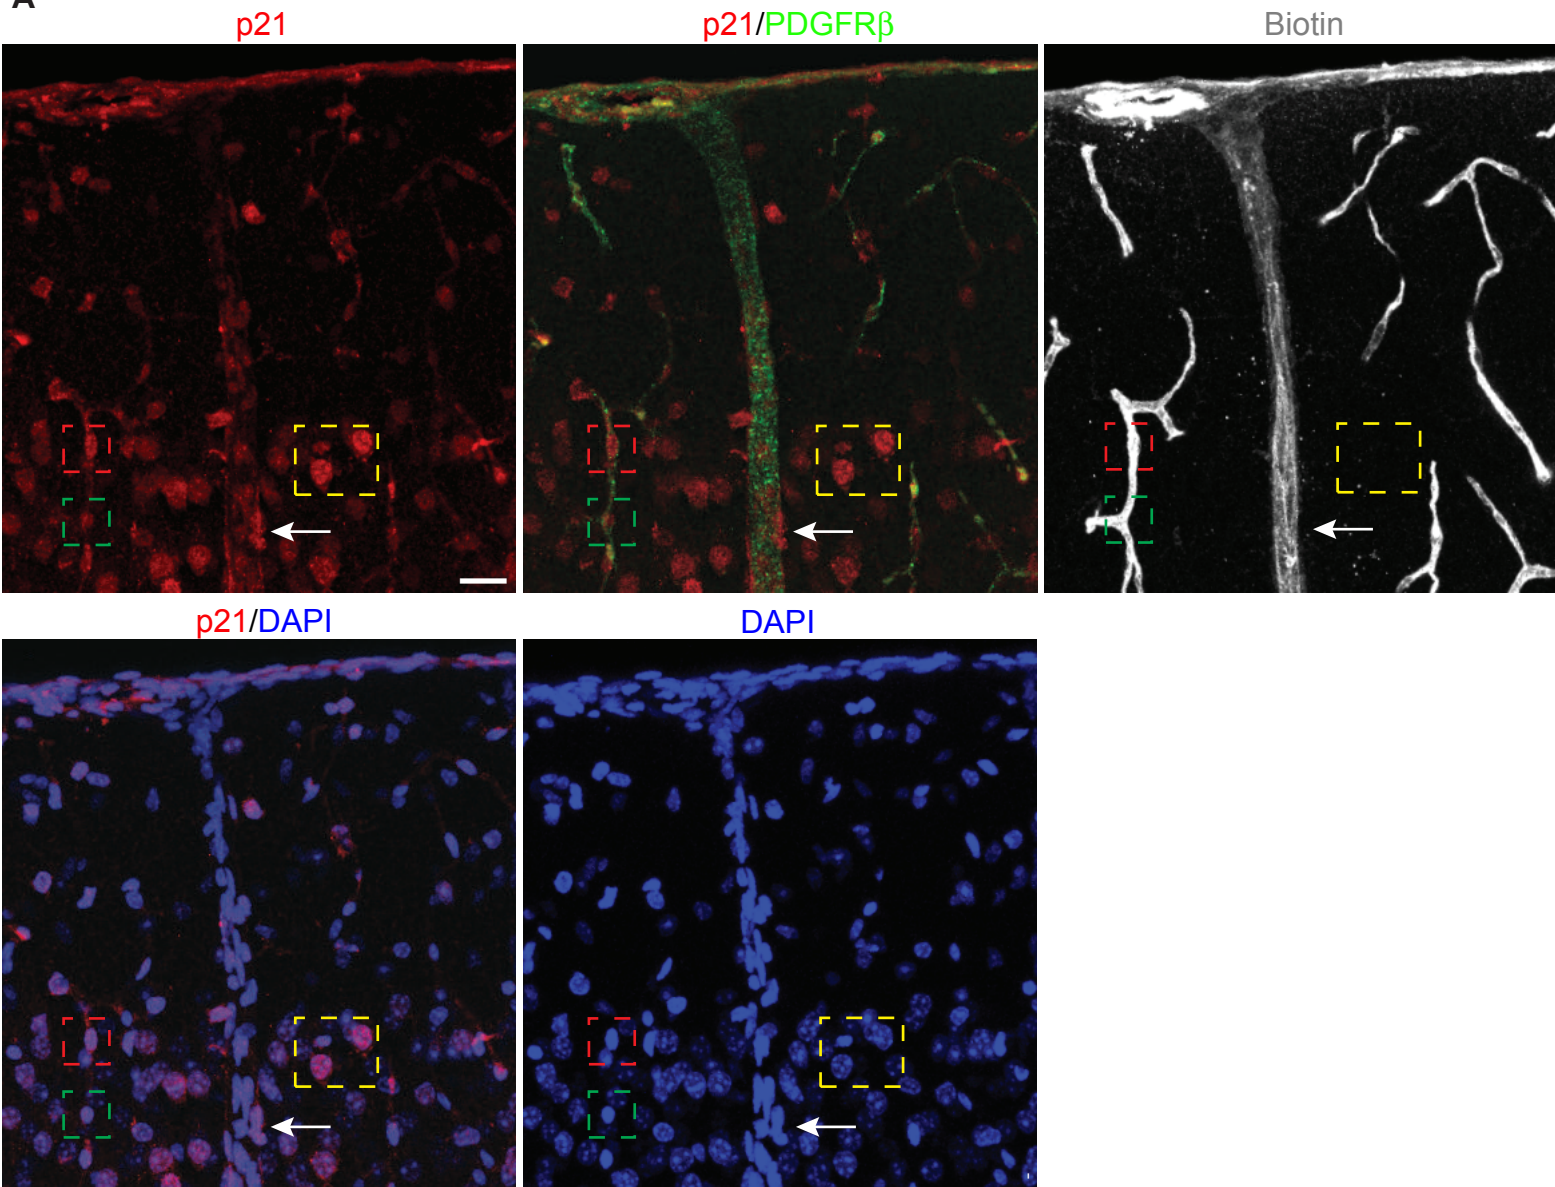

B

(i)

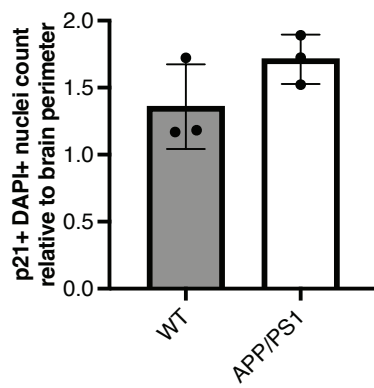

(ii)

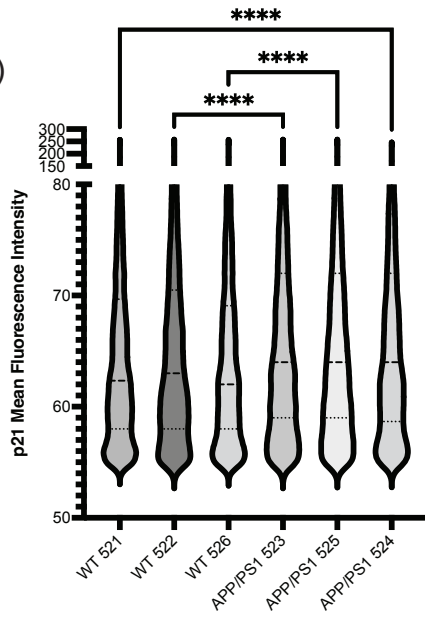



Fig. s9

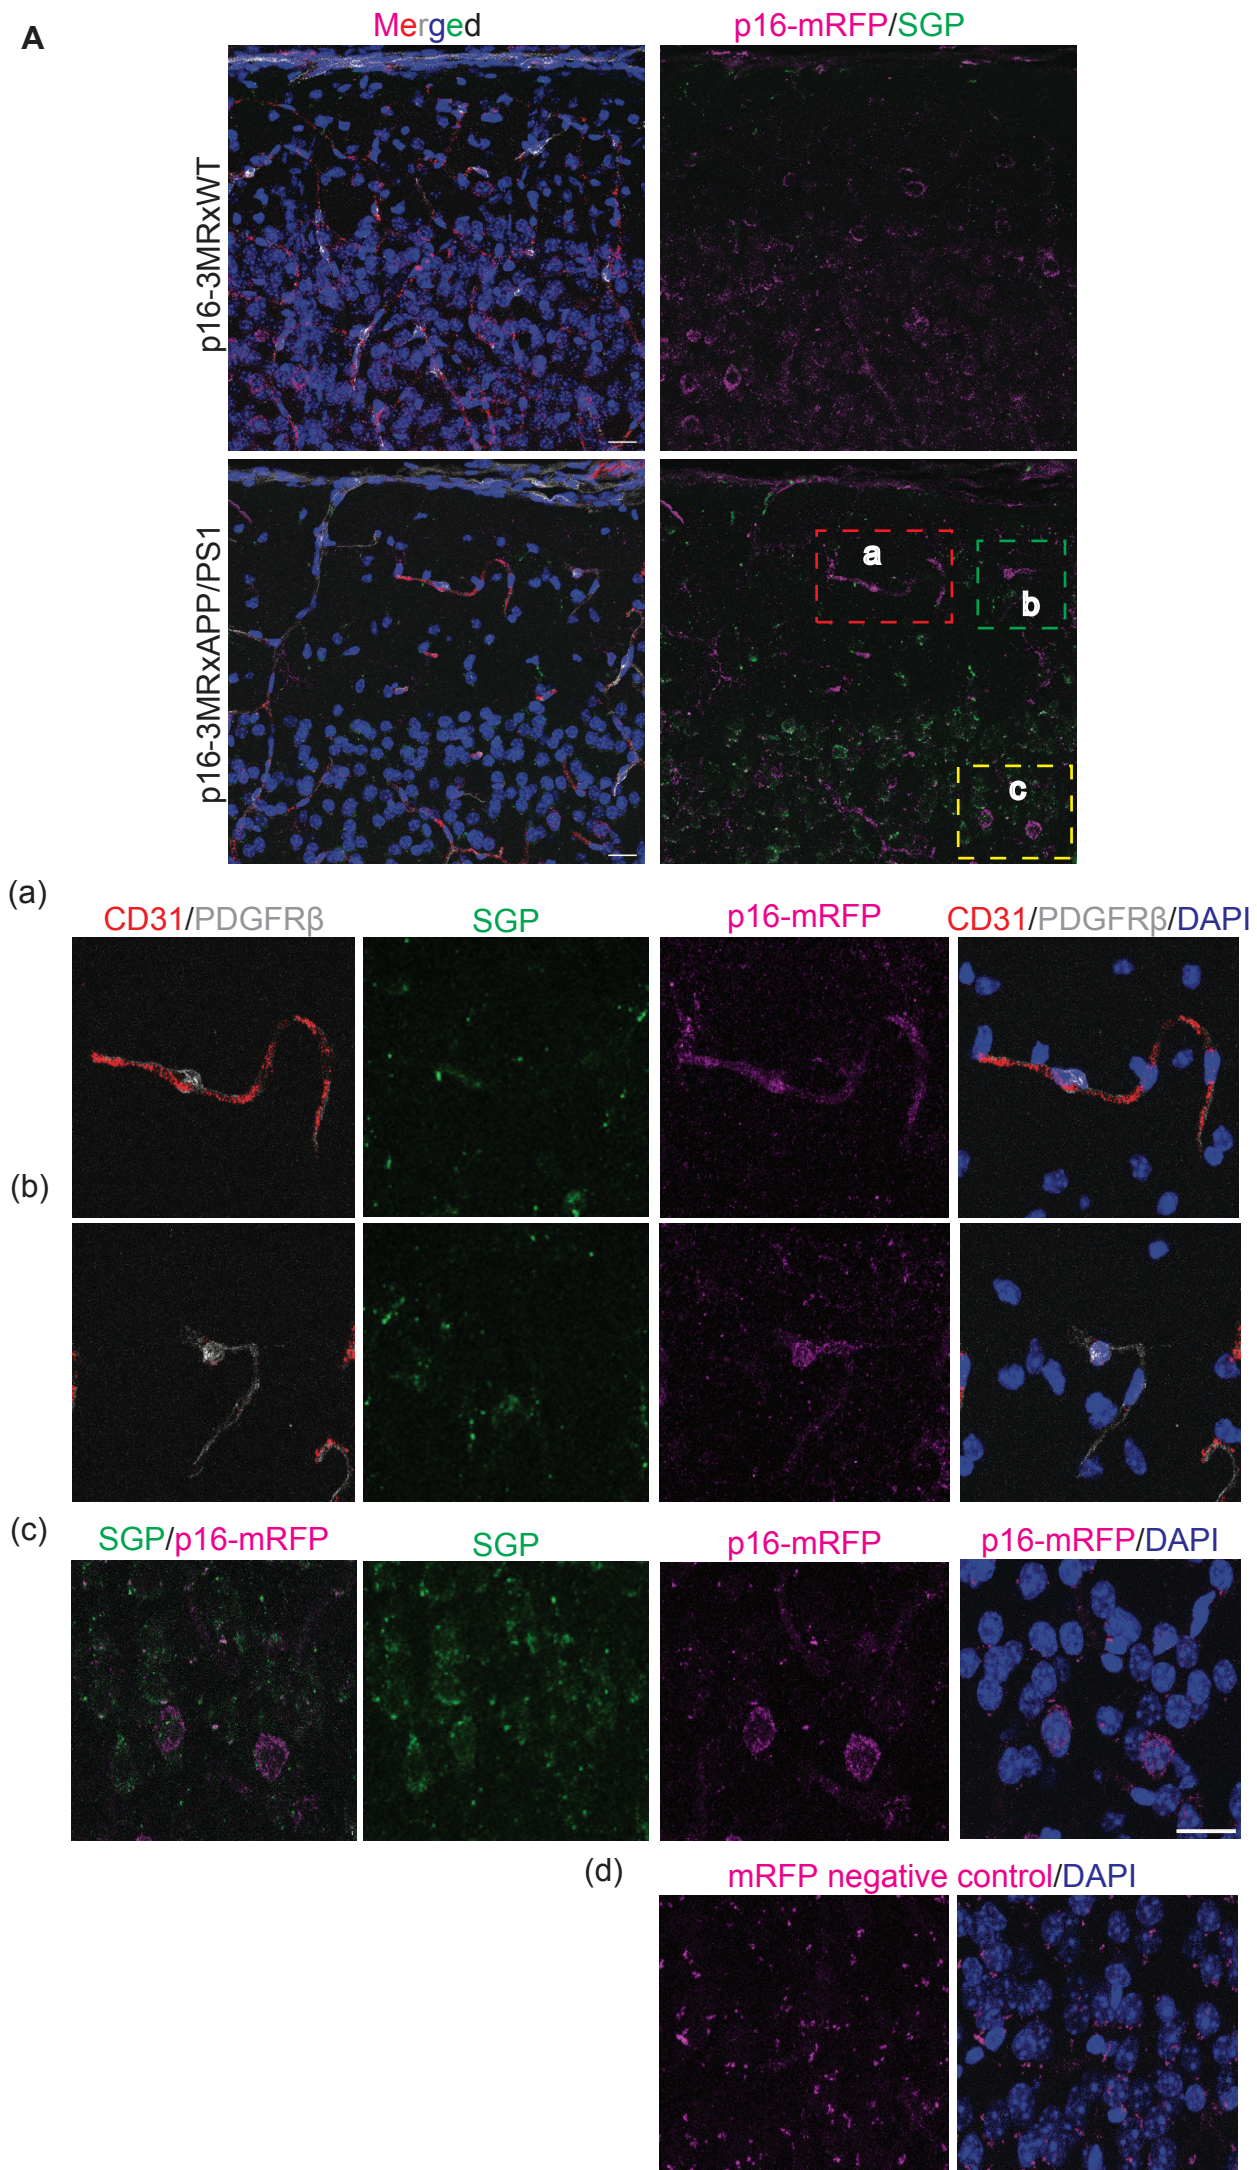

Fig. s10

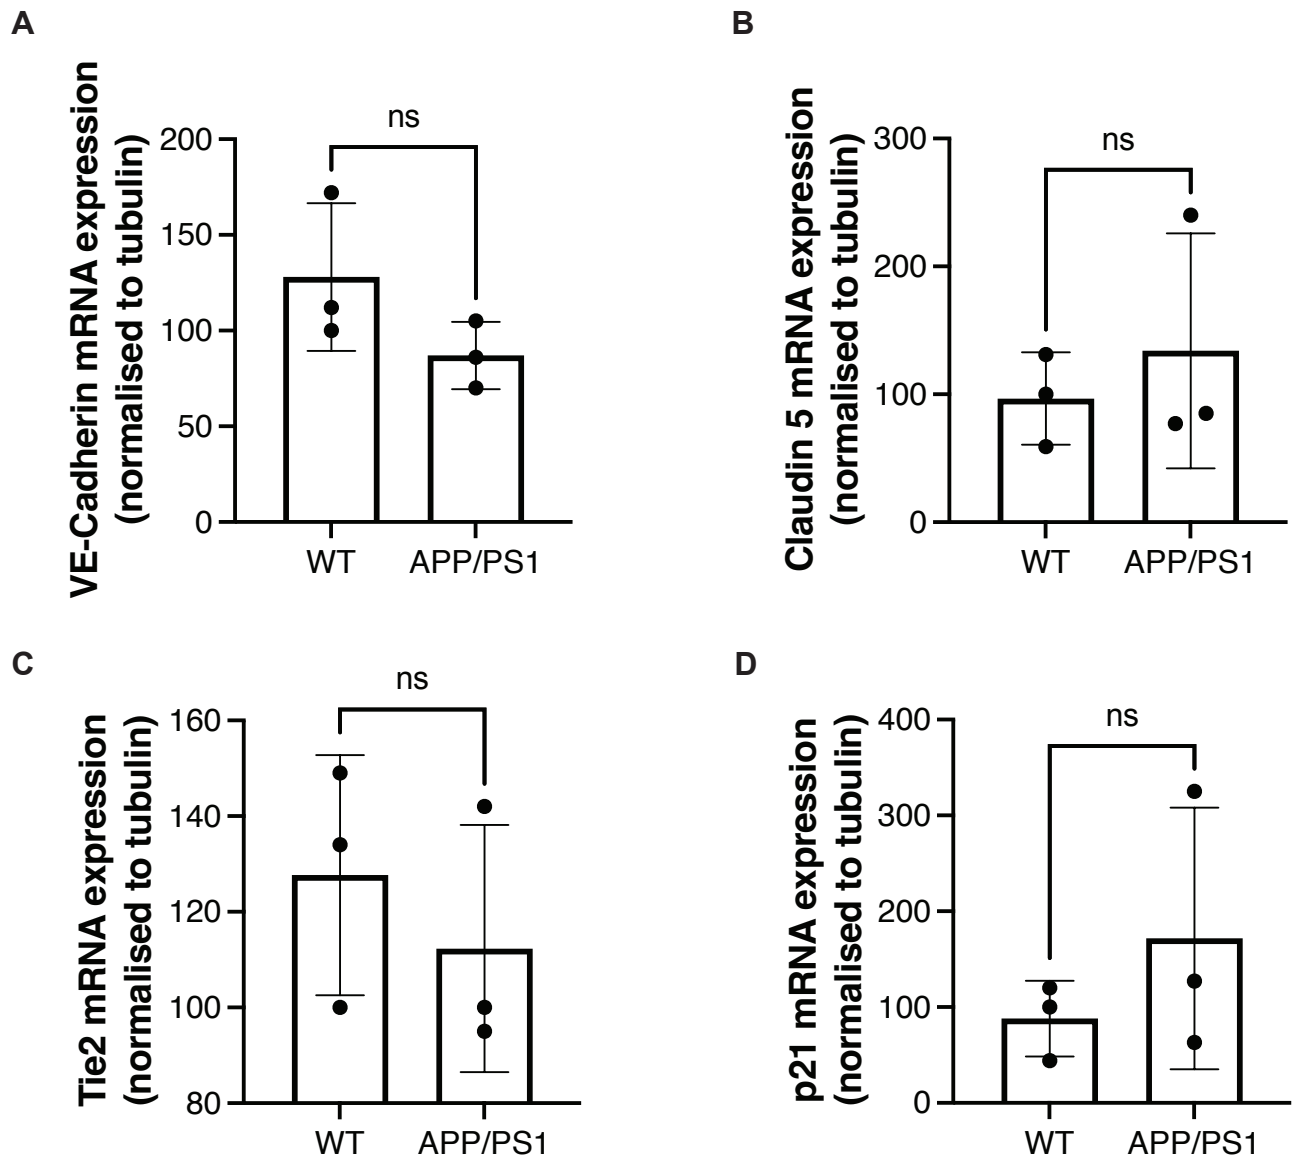

Fig. s11

No primary antibody, only secondary antibodies control

A

anti-rabbit 647

anti-rat 594

anti-goat 488

DAPI

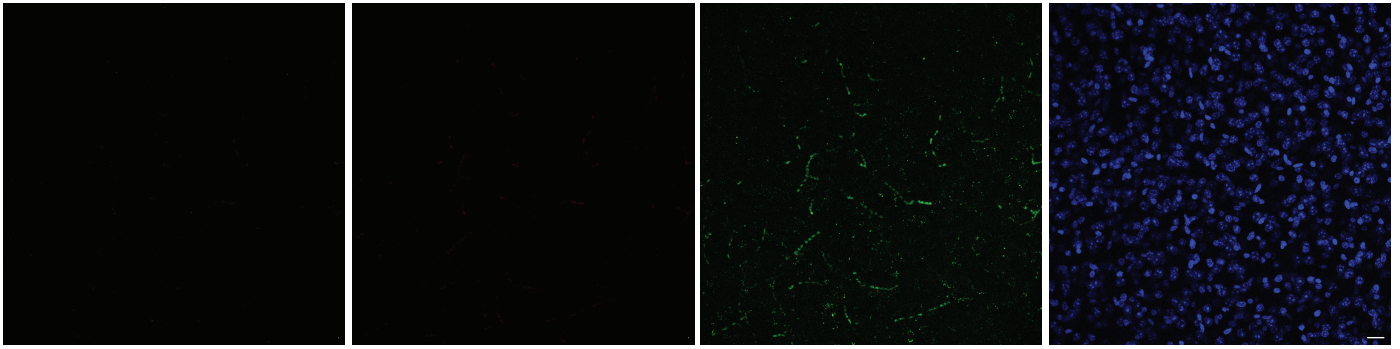

B

-Biotin/CD31

+Biotin/CD31

WT

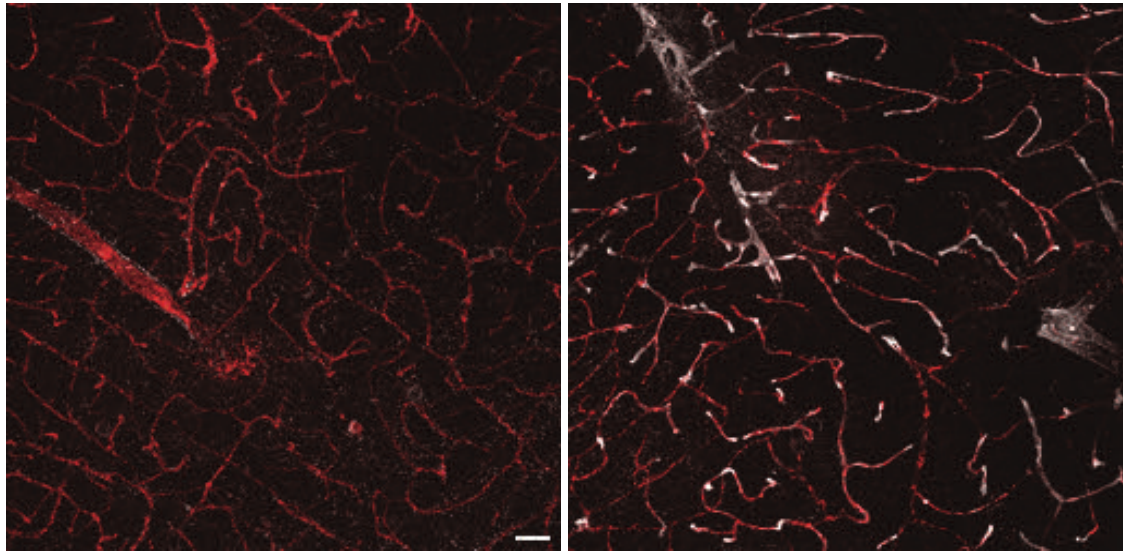

Supplement: 11357_2023_927_MOESM2_ESM.pdf [file 11357_2023_927_MOESM2_ESM.pdf]
